# Supplementary material for: Developing Capabilities From the Scope of Emotional Intelligence as Part of the Soft Skills Needed in the Long-Term Care Sector: Presentation of Pilot Study and Training Methodology
Source: PubMed Central journal article supplement — J Prim Care Community Health. 2020 Feb 18;11:2150132720906275. doi: 10.1177/2150132720906275 (PMC7031788; doi:10.1177/2150132720906275), 2020-02-18
Supplement: Appendix4.pdf [file Appendix4.pdf]

|                             |                        | 1. After: The patient is nervous / anxious and raises the tone, and the caregiver responds calmly and steadily.<br>1. Before: The patient is nervous / anxious and raises the tone, and the caregiver responds calmly and steadily. | 2. After: In the event of a conflict between the patient and the caregiver, she recedes, and waits for a while before raising the same subject.<br>2. Before: In the event of a conflict between the patient and the caregiver, she recedes, and waits for a while before raising the same subject. | 3. After: When providing information that may irritate patient, the caregiver selects his words carefully.<br>3. Before: When providing information that may irritate patient, the caregiver selects her words carefully. |
|-----------------------------|------------------------|-------------------------------------------------------------------------------------------------------------------------------------------------------------------------------------------------------------------------------------|-----------------------------------------------------------------------------------------------------------------------------------------------------------------------------------------------------------------------------------------------------------------------------------------------------|---------------------------------------------------------------------------------------------------------------------------------------------------------------------------------------------------------------------------|
| Kind of group               |                        |                                                                                                                                                                                                                                     |                                                                                                                                                                                                                                                                                                     |                                                                                                                                                                                                                           |
| Test group (trained)        | Z                      | -4.874 <sup>b</sup>                                                                                                                                                                                                                 | -4.837 <sup>b</sup>                                                                                                                                                                                                                                                                                 | -4.939 <sup>b</sup>                                                                                                                                                                                                       |
|                             | Asymp. Sig. (2-tailed) | 0.000                                                                                                                                                                                                                               | 0.000                                                                                                                                                                                                                                                                                               | 0.000                                                                                                                                                                                                                     |
| Control group (no training) | Z                      | -.927 <sup>c</sup>                                                                                                                                                                                                                  | -1.380 <sup>b</sup>                                                                                                                                                                                                                                                                                 | -.404 <sup>c</sup>                                                                                                                                                                                                        |
|                             | Asymp. Sig. (2-tailed) | 0.354                                                                                                                                                                                                                               | 0.167                                                                                                                                                                                                                                                                                               | 0.686                                                                                                                                                                                                                     |

a. Wilcoxon Signed Ranks Test

b. Based on negative ranks.

c. Based on positive ranks.

### Test Statistics<sup>a</sup>

| 4. After: When the patient is being rude, the caregiver does not indicate that they are affected or angry.<br>4. Before: When the patient is being rude, the caregiver does not indicate that he or she is affected or angry. | 5. After: The patient and / or his / her relatives share with the caregiver the opinion that there are activities that she / he has not performed at the required level.<br>5. Before: The patient and / or his / her relatives share with the caregiver the opinion that there are activities that she / he has not performed at the required level. | 6. After: The caregiver manages, without raising the tone, to make the patient follow the rules and procedures.<br>6. Before: The caregiver manages, without raising the tone, to make the patient follow the rules and procedures. | 7. After: The caregiver shows genuine and genuine concern for the suffering of the patient by asking questions actively.<br>7. Before: The caregiver shows genuine and genuine concern for the suffering of the patient by asking questions actively. | 8. After: The caregiver expresses an emotion corresponding to the emotion expressed by the patient.<br>8. Before: The caregiver expresses an emotion corresponding to the emotion expressed by the patient. | 9. After: The caregiver speaks in a way that demonstrates that she understands the pain, suffering, distress of the patient.<br>9. Before: The caregiver speaks in a way that shows that she understands the pain, suffering, distress of the patient. |
|-------------------------------------------------------------------------------------------------------------------------------------------------------------------------------------------------------------------------------|-------------------------------------------------------------------------------------------------------------------------------------------------------------------------------------------------------------------------------------------------------------------------------------------------------------------------------------------------------|-------------------------------------------------------------------------------------------------------------------------------------------------------------------------------------------------------------------------------------|-------------------------------------------------------------------------------------------------------------------------------------------------------------------------------------------------------------------------------------------------------|-------------------------------------------------------------------------------------------------------------------------------------------------------------------------------------------------------------|--------------------------------------------------------------------------------------------------------------------------------------------------------------------------------------------------------------------------------------------------------|
| -4.794 <sup>b</sup>                                                                                                                                                                                                           | -4.945 <sup>b</sup>                                                                                                                                                                                                                                                                                                                                   | -4.823 <sup>b</sup>                                                                                                                                                                                                                 | -4.720 <sup>b</sup>                                                                                                                                                                                                                                   | -5.055 <sup>b</sup>                                                                                                                                                                                         | -5.017 <sup>b</sup>                                                                                                                                                                                                                                    |
| 0.000                                                                                                                                                                                                                         | 0.000                                                                                                                                                                                                                                                                                                                                                 | 0.000                                                                                                                                                                                                                               | 0.000                                                                                                                                                                                                                                                 | 0.000                                                                                                                                                                                                       | 0.000                                                                                                                                                                                                                                                  |
| -.538 <sup>c</sup>                                                                                                                                                                                                            | -.346 <sup>b</sup>                                                                                                                                                                                                                                                                                                                                    | -.808 <sup>b</sup>                                                                                                                                                                                                                  | -.758 <sup>b</sup>                                                                                                                                                                                                                                    | -.447 <sup>c</sup>                                                                                                                                                                                          | -.346 <sup>b</sup>                                                                                                                                                                                                                                     |
| 0.591                                                                                                                                                                                                                         | 0.729                                                                                                                                                                                                                                                                                                                                                 | 0.419                                                                                                                                                                                                                               | 0.449                                                                                                                                                                                                                                                 | 0.655                                                                                                                                                                                                       | 0.729                                                                                                                                                                                                                                                  |

|                                                                                                                                                                                                                                                                                                   |                                                                                                                                                                                                                                                                                                                 |                                                                                                                                                                                                                                                                                               |
|---------------------------------------------------------------------------------------------------------------------------------------------------------------------------------------------------------------------------------------------------------------------------------------------------|-----------------------------------------------------------------------------------------------------------------------------------------------------------------------------------------------------------------------------------------------------------------------------------------------------------------|-----------------------------------------------------------------------------------------------------------------------------------------------------------------------------------------------------------------------------------------------------------------------------------------------|
| 10. After: The patient experiences physical or mental pain, but do not talk about it - nevertheless the caregiver recognizes this suffering.<br>10. Before: The patient is experiencing physical or mental pain, but do not talk about it - nevertheless the caregiver recognizes this suffering. | 11. After: Although she has not been in this situation, the caregiver indicates that she fully understands and experiences the pain / suffering of the patient.<br>11. Before: Although she was not in such a situation, the caregiver shows that she fully understands and experiences the pain / suffering of | 12. After: The patient shares their thoughts or feelings, and the caregiver shows complete understanding and provides psychological support.<br>12. Before: The patient shares their thoughts or feelings, and the caregiver shows complete understanding and provides psychological support. |
| -4.846 <sup>b</sup>                                                                                                                                                                                                                                                                               | -5.011 <sup>b</sup>                                                                                                                                                                                                                                                                                             | -4.916 <sup>b</sup>                                                                                                                                                                                                                                                                           |
| 0.000                                                                                                                                                                                                                                                                                             | 0.000                                                                                                                                                                                                                                                                                                           | 0.000                                                                                                                                                                                                                                                                                         |
| -.266 <sup>b</sup>                                                                                                                                                                                                                                                                                | -.390 <sup>b</sup>                                                                                                                                                                                                                                                                                              | -.473 <sup>b</sup>                                                                                                                                                                                                                                                                            |
| 0.790                                                                                                                                                                                                                                                                                             | 0.696                                                                                                                                                                                                                                                                                                           | 0.636                                                                                                                                                                                                                                                                                         |
