# Supplementary material for: Developing Capabilities From the Scope of Emotional Intelligence as Part of the Soft Skills Needed in the Long-Term Care Sector: Presentation of Pilot Study and Training Methodology
Source: PubMed Central journal article supplement — J Prim Care Community Health. 2020 Feb 18;11:2150132720906275. doi: 10.1177/2150132720906275 (PMC7031788; doi:10.1177/2150132720906275), 2020-02-18
Supplement: appendix_2.pdf [file appendix_2.pdf]

## SURVEY

The purpose of this survey is to explore the significant competencies (knowledge, skills, attitudes and behaviors) that need to be built and developed as a prerequisite for a high level of caregiver performance in a domestic environment.

*Thanks in advance for all your effort!*

*Give your digital assessment of the weight of the relevant competence according to the scale:*

*1 - does not do it*

*2 - sometimes, but rarely does*

*3 - in half the cases does in the other half does not*

*4 - more often does*

*5 - always does it*

| <b>Basic labor tasks</b>                                                                                                                                                                                                                                   | <b>Degree of significance<br/>( 1 to 5 points)</b> |                            |                                                         |                 |                |
|------------------------------------------------------------------------------------------------------------------------------------------------------------------------------------------------------------------------------------------------------------|----------------------------------------------------|----------------------------|---------------------------------------------------------|-----------------|----------------|
|                                                                                                                                                                                                                                                            | does not do it                                     | sometimes, but rarely does | in half the cases does in the other half does not do it | more often does | always does it |
|                                                                                                                                                                                                                                                            | <b>1</b>                                           | <b>2</b>                   | <b>3</b>                                                | <b>4</b>        | <b>5</b>       |
| 1. Observes health and safety rules in the performance of their duties - applies the basic rules for safe procedure at work; avoids possible occupational and health risks in the work environment; preventive measures for fire and accident safety, etc. |                                                    |                            |                                                         |                 |                |
| 2. Is well aware of the legal framework - the Labor Code; different types of documents; the structure of different types of documents - declaration, statement, complaint, etc.                                                                            |                                                    |                            |                                                         |                 |                |
| 3. Is ready to upgrade their professional qualification.                                                                                                                                                                                                   |                                                    |                            |                                                         |                 |                |

|                                                                                                                   |  |  |  |  |  |
|-------------------------------------------------------------------------------------------------------------------|--|--|--|--|--|
| 4. Collect detailed information about the health of the patient.                                                  |  |  |  |  |  |
| 5. Effectively communicates the patient                                                                           |  |  |  |  |  |
| 6. Effective communication with the patient's relatives                                                           |  |  |  |  |  |
| 7. Responds adequately to stressful situations..                                                                  |  |  |  |  |  |
| 8. Prepares and anticipates the possibility of conflict.                                                          |  |  |  |  |  |
| 9. Responds appropriately to conflict.                                                                            |  |  |  |  |  |
| 10. Can adapt quickly and easily to changes in work.                                                              |  |  |  |  |  |
| 11. Know the physiology and pathophysiology of the human anatomy during aging.                                    |  |  |  |  |  |
| 12. Know the symptoms of orthopedic and traumatic conditions.                                                     |  |  |  |  |  |
| 13. Observes the rules of good practice and follows the appointments of medical professionals and / or relatives. |  |  |  |  |  |
| 14. Provides care for the patient while resident in a health facility.                                            |  |  |  |  |  |
| 15. Provides support in domestic crisis situations (loss of someone close).                                       |  |  |  |  |  |
| 16. Provides support in household risk situations.                                                                |  |  |  |  |  |
| 17. Provides assistance in situations that endanger the health and life of the patient.                           |  |  |  |  |  |
| 18. Provides basic patient bed care.                                                                              |  |  |  |  |  |
| 19. Apply different forms of specific care in specific pathological cases.                                        |  |  |  |  |  |
| 20. Trace and record data on the patient's physical and mental condition.                                         |  |  |  |  |  |
| 21. Assists a person in need to meet his / her basic life needs.                                                  |  |  |  |  |  |
| 22. Supports nutrition and fluid intake with regard to the condition and disease of the patient.                  |  |  |  |  |  |
| 23. Maintains patient's personal hygiene.                                                                         |  |  |  |  |  |

|                                                                                                                                                  |  |  |  |  |  |
|--------------------------------------------------------------------------------------------------------------------------------------------------|--|--|--|--|--|
| 24. Helps healthcare professionals assist the patient in taking oral medication, conducting cumulative and hardening procedures for the patient. |  |  |  |  |  |
| 25. Supports patient movement.                                                                                                                   |  |  |  |  |  |
| 26. Performs breathing activities.                                                                                                               |  |  |  |  |  |
| 27. Monitors the condition of secretory functions.                                                                                               |  |  |  |  |  |
| 28. Provides optimal sleep and rest conditions in keeping with the biological regime.                                                            |  |  |  |  |  |
| 29. Provides the user with entertainment according to his condition and desire.                                                                  |  |  |  |  |  |
| 30. Maintains patient household.                                                                                                                 |  |  |  |  |  |
| 31. Shopping.                                                                                                                                    |  |  |  |  |  |
| 32. Assists with transportation of the patient.                                                                                                  |  |  |  |  |  |

**Additional characteristics of persons completing:**

I. Type of Respondent:

1. Patients

2. Experts in the field
