# Supplementary material for: Developing Capabilities From the Scope of Emotional Intelligence as Part of the Soft Skills Needed in the Long-Term Care Sector: Presentation of Pilot Study and Training Methodology
Source: PubMed Central journal article supplement — J Prim Care Community Health. 2020 Feb 18;11:2150132720906275. doi: 10.1177/2150132720906275 (PMC7031788; doi:10.1177/2150132720906275), 2020-02-18
Supplement: Appendix_3.pdf [file Appendix_3.pdf]

|                                                                                                                                                                                                                                                                                                                                                                                                                                                                                                                                                                                                                                                                        |                      |                                                                                                                   |
|------------------------------------------------------------------------------------------------------------------------------------------------------------------------------------------------------------------------------------------------------------------------------------------------------------------------------------------------------------------------------------------------------------------------------------------------------------------------------------------------------------------------------------------------------------------------------------------------------------------------------------------------------------------------|----------------------|-------------------------------------------------------------------------------------------------------------------|
| <b>Module 1 - Empathic interaction.</b>                                                                                                                                                                                                                                                                                                                                                                                                                                                                                                                                                                                                                                | Duration 3.5 hours   | Participants: 2 groups of 16 participants each.                                                                   |
| <p>Session 1.</p> <p>Icebreaker 1 aims to make the group warm up. People warm up to be together. Includes several sociograms (professional experience, experience in teamwork, etc.).</p> <p>Icebreaker 2. Warming up toward the topic and learning process.</p> <p>Working in small groups: "What is the most energy consuming aspect of my work? "</p> <p>A presentation on empathy, the need for it, and what role it plays for the mental well-being of caregivers.</p> <p>Marking the differences between cognitive and affective empathy.</p> <p>Working in Pairs - How Can We Demonstrate Empathy?</p> <p>Read and retrieve the most applicable behaviours.</p> | Duration 90 minutes. | Activities: Presentation, work in two groups; working in pairs with a learning partner, debriefing and discussion |
| Coffee break                                                                                                                                                                                                                                                                                                                                                                                                                                                                                                                                                                                                                                                           | 20 minutes           |                                                                                                                   |
| <p>Session 2.</p> <p>Warm up to a role play.</p> <p>Role Playing by Case 1.</p>                                                                                                                                                                                                                                                                                                                                                                                                                                                                                                                                                                                        | 100 minutes          | Activities: preparing to enter into a role; role play; debriefing and sharing.                                    |

|                                                                                                                                                                                                                                                                                                                                                                                                                                                                                                                        |  |  |
|------------------------------------------------------------------------------------------------------------------------------------------------------------------------------------------------------------------------------------------------------------------------------------------------------------------------------------------------------------------------------------------------------------------------------------------------------------------------------------------------------------------------|--|--|
| <p>The activity game is performed first by a couple in front of the whole group, then practiced by all participants with a partner. The main focus of the game is to reverse roles, so that the participants can take on the role of the patient.</p> <p>The following debriefing focuses on the emotions the participants have experienced through being in the role of the patient.</p> <p>Module closure, by sharing personal experiences in similar situations and the potential use of empathic interactions.</p> |  |  |
|------------------------------------------------------------------------------------------------------------------------------------------------------------------------------------------------------------------------------------------------------------------------------------------------------------------------------------------------------------------------------------------------------------------------------------------------------------------------------------------------------------------------|--|--|

|                                                                                                                                                                                                                                   |                     |                                                                                                               |
|-----------------------------------------------------------------------------------------------------------------------------------------------------------------------------------------------------------------------------------|---------------------|---------------------------------------------------------------------------------------------------------------|
| Module 2. Managing Conflict and Enhancing Self-Control in Conflict Situations.                                                                                                                                                    | Duration 3.5 hours  | Participants: 2 groups of 16 participants each.                                                               |
| Session 1:<br>Icebreaker 1. Warm up for the group process with a return to the emotions that the participant has experienced coming from the first module and those they experience coming from the second one (using a handout). | Duration 90 minutes | Activities: Icebreakers; working in small groups, individual assignment - associative technique; presentation |

|                                                                                                                                                                                                                                                                                                                                                                                                                                                                                                             |             |                                                                                                                         |
|-------------------------------------------------------------------------------------------------------------------------------------------------------------------------------------------------------------------------------------------------------------------------------------------------------------------------------------------------------------------------------------------------------------------------------------------------------------------------------------------------------------|-------------|-------------------------------------------------------------------------------------------------------------------------|
| <p>2. Warm up toward the theme<br/>-a history to finish ... an individual icebreaker in which each participant completes a given story - an associative technique.<br/>Working in two groups: "The most common reasons for conflict with the patients and their relatives" - reading and discussing.<br/>Presentation: What puts us into conflict and what is "emergency mode" our reaction to it.</p>                                                                                                      |             |                                                                                                                         |
| Coffee break                                                                                                                                                                                                                                                                                                                                                                                                                                                                                                | 20 minutes  |                                                                                                                         |
| <p>Session 2<br/>Presentation of behavioral techniques for de-escalation of tension in conflict.<br/>Warm up for a role play.<br/>Role Playing - Case 2. In this case, the facilitator takes the role of a patient who behaves confrontationally, and each participant uses one of the learned techniques to de-stress the tension and to manage the potential conflict.<br/>The role plays are followed by debriefing and conclusions.<br/>Wrap up the topic - working in pairs with learning partner:</p> | 100 minutes | <p>Activities: Role play and debriefing; presentation of techniques; work in pairs; final activity group (wrap up).</p> |

|                                                                                                                                                                               |  |  |
|-------------------------------------------------------------------------------------------------------------------------------------------------------------------------------|--|--|
| <p>“What are the cross points of empathy and conflict management?”. The participants come to the conclusion that manifestations of empathy are often conflict prevention.</p> |  |  |
|-------------------------------------------------------------------------------------------------------------------------------------------------------------------------------|--|--|
